# Supplementary material
Source: PubMed Central journal article supplement (PMC2768485)
Supplement: NIHMS152448-supplement-Fig_1SA.pdf [file NIHMS152448-supplement-Fig_1SA.pdf]

## Supplemental Figure Legends

Figure 1: Time courses of ATP-induced death in LPS plus IFN-gamma-primed BMDM versus IFN-gamma-primed BMDM versus LPS plus IFN-gamma-primed P2X7R-knockout BMDM
