# Supplementary material
Source: PubMed Central journal article supplement (PMC2768485)

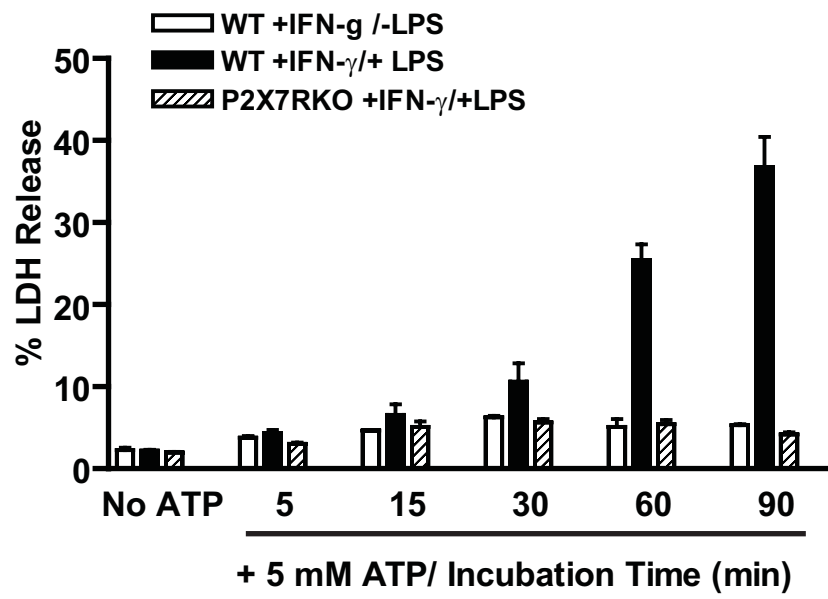

Supplemental Data -Fig 1

Supplement: NIHMS152448-supplement-Fig_1S.pdf [file NIHMS152448-supplement-Fig_1S.pdf]
